# Supplementary material for: Healthcare Workers’ Perspectives on Artificial Intelligence in Primary Care
Source: Research Square preprint supplement (doi:10.21203/rs.3.rs-7346278/v1), 2025-09-23
Supplement: Supplementary file 1 [file 8cfff2fd5cc4bccc462fcc8e.docx]

**Dear Respondent,**

You are invited to participate in a research study aiming to analyze the attitudes and experiences of primary healthcare professionals regarding the application of artificial intelligence (AI) in their work. The results will help to better understand expectations, concerns, and readiness for AI integration in healthcare. The questionnaire consists of several statements.
Your responses are completely anonymous and confidential. All data will be used solely for academic purposes in aggregated form, without identifying individuals. Participation is voluntary, and you may withdraw at any time. The study follows ethical standards and has been reviewed and approved by the appropriate bioethics committee of SMK College of Social Sciences.

Information about the Research: Viljaras Reigas, e-mail: [Viljaras.reigas@gmail.com](mailto:Viljaras.reigas@gmail.com)

Please indicate the extent to which you agree with each statement by selecting one of the options on a 5-point Likert scale:
1 – Strongly disagree, 5 – Strongly agree.

**Perceived benefits of AI**

| **Statement** | **1 Strongly disagree** | **2** | **3** | **4** | **5 Strongly agree** |
| --- | --- | --- | --- | --- | --- |
| Artificial intelligence can reduce the likelihood of errors in my work. | ☐ | ☐ | ☐ | ☐ | ☐ |
| AI solutions can improve the quality of patient care. | ☐ | ☐ | ☐ | ☐ | ☐ |
| AI helps make faster and more accurate decisions. | ☐ | ☐ | ☐ | ☐ | ☐ |
| AI technologies make healthcare services more accessible. | ☐ | ☐ | ☐ | ☐ | ☐ |
| AI can increase the efficiency of healthcare services. | ☐ | ☐ | ☐ | ☐ | ☐ |

**Threat to professional autonomy**

| **Statement** | **1 Strongly disagree** | **2** | **3** | **4** | **5 Strongly agree** |
| --- | --- | --- | --- | --- | --- |
| AI limits my ability to make independent decisions. | ☐ | ☐ | ☐ | ☐ | ☐ |
| Technology may weaken the human connection between professional and patient. | ☐ | ☐ | ☐ | ☐ | ☐ |
| AI makes my professional identity less clear. | ☐ | ☐ | ☐ | ☐ | ☐ |
| I fear that AI will take over some of my responsibilities. | ☐ | ☐ | ☐ | ☐ | ☐ |
| AI decisions may not consider individual patient context. | ☐ | ☐ | ☐ | ☐ | ☐ |

**Personal readiness and motivation**

| **Statement** | **1 Strongly disagree** | **2** | **3** | **4** | **5 Strongly agree** |
| --- | --- | --- | --- | --- | --- |
| I am interested in AI applications in my work. | ☐ | ☐ | ☐ | ☐ | ☐ |
| I am willing to learn how to use AI in practice. | ☐ | ☐ | ☐ | ☐ | ☐ |
| I am ready to integrate AI into my professional activities. | ☐ | ☐ | ☐ | ☐ | ☐ |
| AI sparks my curiosity and interest to learn more. | ☐ | ☐ | ☐ | ☐ | ☐ |
| I trust my ability to learn how to use AI tools. | ☐ | ☐ | ☐ | ☐ | ☐ |

**Organizational support and learning**

| **Statement** | **1 Strongly disagree** | **2** | **3** | **4** | **5 Strongly agree** |
| --- | --- | --- | --- | --- | --- |
| My institution encourages interest in AI technologies. | ☐ | ☐ | ☐ | ☐ | ☐ |
| Management provides relevant information about AI implementation. | ☐ | ☐ | ☐ | ☐ | ☐ |
| We have opportunities to participate in AI-related training. | ☐ | ☐ | ☐ | ☐ | ☐ |
| Technical support for implementing AI is sufficient. | ☐ | ☐ | ☐ | ☐ | ☐ |
| The organization has a plan for integrating AI into practice. | ☐ | ☐ | ☐ | ☐ | ☐ |

**Ethical and responsibility aspects**

| **Statement** | **1 Strongly disagree** | **2** | **3** | **4** | **5 Strongly agree** |
| --- | --- | --- | --- | --- | --- |
| AI decisions should be clearly explained to the patient. | ☐ | ☐ | ☐ | ☐ | ☐ |
| I am concerned about who will be responsible if AI causes harm. | ☐ | ☐ | ☐ | ☐ | ☐ |
| Patient data security is at risk with AI use. | ☐ | ☐ | ☐ | ☐ | ☐ |
| AI may harm ethical principles in healthcare. | ☐ | ☐ | ☐ | ☐ | ☐ |
| It is necessary to clearly define the boundaries of human and AI responsibility. | ☐ | ☐ | ☐ | ☐ | ☐ |

**Practical experience with AI**

| **Statement** | **1 Strongly disagree** | **2** | **3** | **4** | **5 Strongly agree** |
| --- | --- | --- | --- | --- | --- |
| I have personally used AI tools in my work. | ☐ | ☐ | ☐ | ☐ | ☐ |
| AI technologies are already being used in our institution. | ☐ | ☐ | ☐ | ☐ | ☐ |
| I can use at least one AI system independently. | ☐ | ☐ | ☐ | ☐ | ☐ |
| I feel confident using AI tools in practice. | ☐ | ☐ | ☐ | ☐ | ☐ |
| AI tools have already made my work easier. | ☐ | ☐ | ☐ | ☐ | ☐ |

**Demographic Information**

**Work experience in healthcare:**
☐ Less than 5 years
☐ 6–10 years
☐ 11–20 years
☐ More than 20 years

**Gender:**
☐ Male
☐ Female
☐ Other: ____________
☐ Prefer not to say

**Age group:**
☐ Under 30 years
☐ 31–40 years
☐ 41–50 years
☐ 51–60 years
☐ 61 years or older

**Professional role:**
☐ Physician
☐ Nurse
☐ Other healthcare professional (please specify): ____________

**Thank you for your time!**
